# Supplementary material
Source: PubMed Central journal article supplement (PMC7686061)
Supplement: NIHMS1637291-supplement-1.pdf [file NIHMS1637291-supplement-1.pdf]

Supplementary Tables

| Supplementary Table 1                                                                           |                     |       |        |       |         |       |         |       |                    |       |        |       |         |       |         |       |
|-------------------------------------------------------------------------------------------------|---------------------|-------|--------|-------|---------|-------|---------|-------|--------------------|-------|--------|-------|---------|-------|---------|-------|
| <i>Prosaccade Task: Primary Saccade Mean and Standard Deviation Data by Group and Condition</i> |                     |       |        |       |         |       |         |       |                    |       |        |       |         |       |         |       |
|                                                                                                 | <i>CON (n = 16)</i> |       |        |       |         |       |         |       | <i>HC (n = 16)</i> |       |        |       |         |       |         |       |
|                                                                                                 | GAP                 |       | NO GAP |       | OVERLAP |       | OVERALL |       | GAP                |       | NO GAP |       | OVERLAP |       | OVERALL |       |
|                                                                                                 | M                   | SD    | M      | SD    | M       | SD    | M       | SD    | M                  | SD    | M      | SD    | M       | SD    | M       | SD    |
| Latency (ms)                                                                                    | 145.35              | 31.62 | 167.05 | 28.43 | 224.17  | 66.09 | 178.86  | 42.05 | 149.61             | 34.04 | 168.73 | 26.31 | 219.75  | 53.58 | 179.36  | 37.98 |
| Accuracy <sup>a</sup>                                                                           | 0.96                | 0.08  | 0.97   | 0.08  | 0.98    | 0.08  | 0.97    | 0.08  | 0.97               | 0.08  | 0.98   | 0.08  | 0.99    | 0.08  | 0.98    | 0.08  |
| Gain <sup>b</sup>                                                                               | 0.94                | 0.08  | 0.95   | 0.08  | 0.96    | 0.08  | 0.95    | 0.08  | 0.96               | 0.09  | 0.97   | 0.09  | 0.98    | 0.08  | 0.97    | 0.09  |
| Duration (ms)                                                                                   | 59.49               | 9.32  | 59.11  | 8.54  | 59.37   | 9.31  | 59.32   | 9.06  | 57.11              | 8.28  | 57.13  | 7.96  | 58.14   | 8.61  | 57.46   | 8.28  |
| Peak Velocity (deg/sec)                                                                         | 365.53              | 59.43 | 361.79 | 52.65 | 358.15  | 55.35 | 361.82  | 55.81 | 378.62             | 60.84 | 372.13 | 58.24 | 376.48  | 58.90 | 375.74  | 59.33 |

<sup>a</sup>Accuracy represents the ratio of a) the distance (in pixels) between central fixation and the end location of the primary saccade to b) the pixel location of the target. <sup>b</sup>Gain represents saccade amplitude/target degrees.

Supplementary Table 2

*Anti-saccade Task: Primary Saccade Mean and Standard Deviation Data by Group and Condition*

|                              | <i>CON (n = 16)</i> |       |        |       |         |       |               |              | <i>HC (n = 16)</i> |       |        |       |         |       |               |              |
|------------------------------|---------------------|-------|--------|-------|---------|-------|---------------|--------------|--------------------|-------|--------|-------|---------|-------|---------------|--------------|
|                              | GAP                 |       | NO GAP |       | OVERLAP |       | OVERALL       |              | GAP                |       | NO GAP |       | OVERLAP |       | OVERALL       |              |
|                              | M                   | SD    | M      | SD    | M       | SD    | M             | SD           | M                  | SD    | M      | SD    | M       | SD    | M             | SD           |
| Latency (ms): correct trials | 313.08              | 53.75 | 317.72 | 55.02 | 374.31  | 62.73 | <i>335.04</i> | <i>57.17</i> | 310.56             | 53.93 | 308.69 | 54.07 | 364.18  | 63.95 | <i>327.81</i> | <i>57.32</i> |
| Latency (ms): error trials   | 151.63              | 39.19 | 177.94 | 39.80 | 188.90  | 69.94 | <i>172.82</i> | <i>49.64</i> | 172.27             | 40.35 | 202.78 | 47.05 | 217.21  | 62.07 | <i>197.42</i> | <i>49.82</i> |
| Error Rate <sup>a</sup>      | 0.25                | 0.16  | 0.25   | 0.16  | 0.16    | 0.10  | <i>0.22</i>   | <i>0.14</i>  | 0.14               | 0.10  | 0.16   | 0.10  | 0.10    | 0.07  | <i>0.13</i>   | <i>0.09</i>  |

<sup>a</sup>Error trials/total trials
